# Supplementary figures and images for: Comparison of Standard and Transepithelial Corneal Cross-Linking for the Treatment of Keratoconus: A Meta-analysis
Source: Hindawi journal article supplement (doi:10.1155/2021/6679770), 2021-01-29

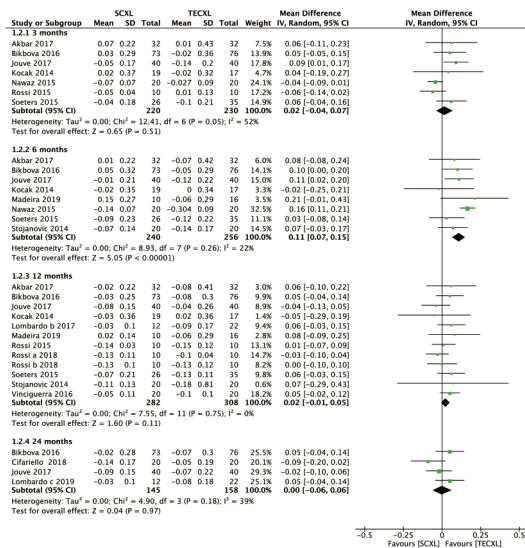

Supplement: f1 [file 6679770.f1.zip]

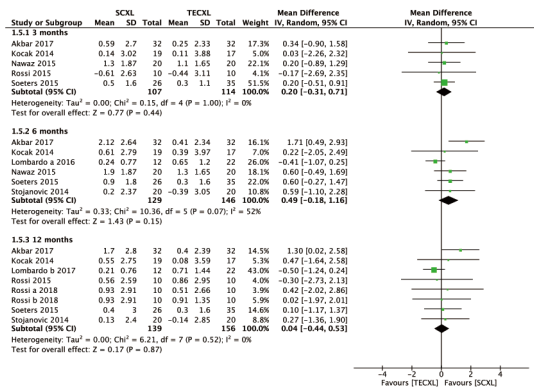

Supplement: f1 [file 6679770.f1.zip]

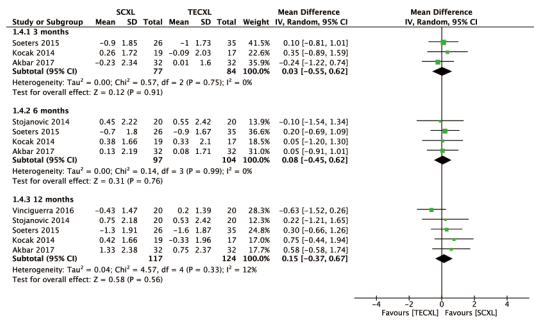

Supplement: f1 [file 6679770.f1.zip]

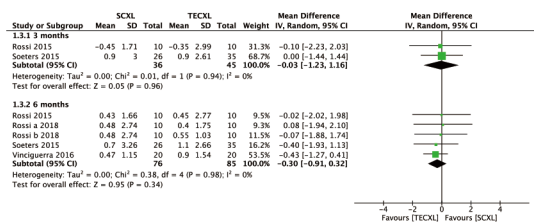

Supplement: f1 [file 6679770.f1.zip]

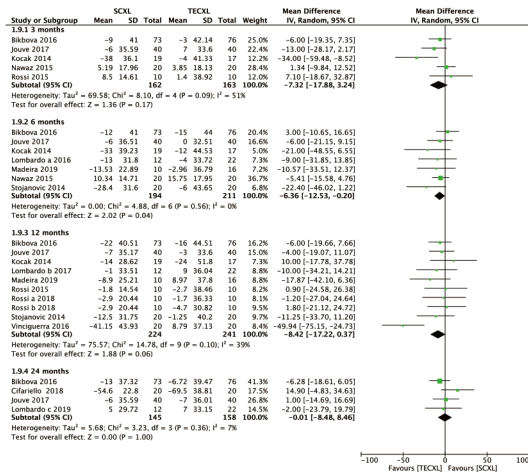

Supplement: f1 [file 6679770.f1.zip]

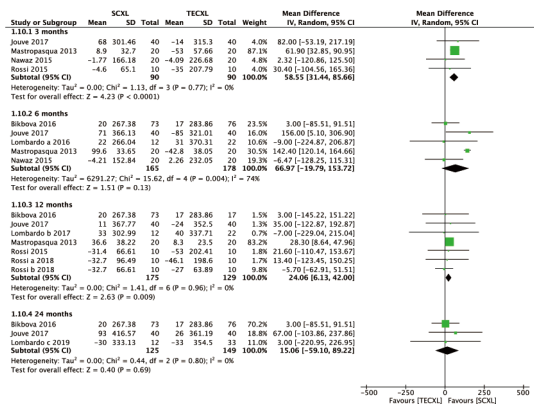

Supplement: f1 [file 6679770.f1.zip]
